# Supplementary material for: Comprehensive identification and expression analysis of CAMTA gene family in Phyllostachys edulis under abiotic stress
Source: PeerJ journal article supplement (doi:10.7717/peerj.15358), 2023-05-08
Supplement: qRTPCR_data.zip [file qRTPCR_data.zip]

## Sheet: 0
	Well		Fluor	Target	Content	Sample	Biological Set Name	Cq	Cq Mean	Cq Std. Dev	Starting Quantity (SQ)	Log Starting Quantity	SQ Mean	SQ Std. Dev	Set Point	Well Note
	A01	CK1	SYBR		Unkn			28.3056	28.3056	0				0	60
	A02	CK1	SYBR		Unkn			29.6919	29.6919	0				0	60
	A03	CK1	SYBR		Unkn			28.26	29.9665	0				0	60
	A04	CK1	SYBR		Unkn			28.2078	28.2078	0				0	60
	A05	3h1	SYBR		Unkn			35.3095	35.3095	0				0	60
	A06	3h1	SYBR		Unkn			35.2591	35.2591	0				0	60
	A07	3h1	SYBR		Unkn				33.4876	0				0	60
	A08	3h1	SYBR		Unkn			35.2454	35.2454	0				0	60
	A09	6h1	SYBR		Unkn			29.7864	29.7864	0				0	60
	A10	6h1	SYBR		Unkn			29.6836	29.6836	0				0	60
	A11	6h1	SYBR		Unkn			29.8396	29.8396	0				0	60
	A12	6h1	SYBR		Unkn			29.8037	29.8037	0				0	60
	B01	12h1	SYBR		Unkn			32.0589	32.0589	0				0	60
	B02	12h1	SYBR		Unkn			30.9069	30.9069	0				0	60
	B03	12h1	SYBR		Unkn			30.2466	30.2466	0				0	60
	B04	12h1	SYBR		Unkn			32.4611	32.4611	0				0	60
	B05	CK2	SYBR		Unkn			30.1743	30.1743	0				0	60
	B06	CK2	SYBR		Unkn			30.0193	30.0193	0				0	60
	B07	CK2	SYBR		Unkn			30.3843	30.3843	0				0	60
	B08	CK2	SYBR		Unkn			30.4788	30.4788	0				0	60
	B09	3h2	SYBR		Unkn			34.1684	34.1684	0				0	60
	B10	3h2	SYBR		Unkn			35.5635	35.5635	0				0	60
	B11	3h2	SYBR		Unkn			33.5746	33.5746	0				0	60
	B12	3h2	SYBR		Unkn				0	0			0	0	60
	C01	6h2	SYBR		Unkn			28.0811	28.0811	0				0	60
	C02	6h2	SYBR		Unkn			27.9803	27.9803	0				0	60
	C03	6h2	SYBR		Unkn			28.0842	28.0842	0				0	60
	C04	6h2	SYBR		Unkn			28.1404	28.1404	0				0	60
	C05	12h2	SYBR		Unkn			28.9452	28.9452	0				0	60
	C06	12h2	SYBR		Unkn			29.2977	29.2977	0				0	60
	C07	12h2	SYBR		Unkn			29.2242	29.2242	0				0	60
	C08	12h2	SYBR		Unkn			29.4305	29.4305	0				0	60
	C09	CK3	SYBR		Unkn			31.5513	31.5513	0				0	60
	C10	CK3	SYBR		Unkn				32.0963	0				0	60
	C11	CK3	SYBR		Unkn			31.2965	31.2965	0				0	60
	C12	CK3	SYBR		Unkn			31.5015	31.5015	0				0	60
	D01	3h3	SYBR		Unkn			37.8289	37.8289	0			0	0	60
	D02	3h3	SYBR		Unkn			36.7178	36.7178	0				0	60
	D03	3h3	SYBR		Unkn			35.6067	35.6067	0			0	0	60
	D04	3h3	SYBR		Unkn				0	0			0	0	60
	D05	6h3	SYBR		Unkn			29.0512	29.0512	0				0	60
	D06	6h3	SYBR		Unkn			29.0215	29.0215	0				0	60
	D07	6h3	SYBR		Unkn			29.2476	29.2476	0				0	60
	D08	6h3	SYBR		Unkn			28.9132	28.9132	0				0	60
	D09	12h3	SYBR		Unkn			29.9959	29.9959	0				0	60
	D10	12h3	SYBR		Unkn			29.5905	29.5905	0				0	60
	D11	12h3	SYBR		Unkn			29.7858	29.7858	0				0	60
	D12	12h3	SYBR		Unkn			29.9213	29.9213	0				0	60
	E01	CK4	SYBR		Unkn			27.9534	27.9534	0				0	60
	E02	CK4	SYBR		Unkn			27.5592	27.5592	0				0	60
	E03	CK4	SYBR		Unkn			27.2864	27.2864	0				0	60
	E04	CK4	SYBR		Unkn			27.3766	27.3766	0				0	60
	E05	3h4	SYBR		Unkn			31.6353	31.6353	0				0	60
	E06	3h4	SYBR		Unkn			31.2806	31.2806	0				0	60
	E07	3h4	SYBR		Unkn			31.2915	31.2915	0				0	60
	E08	3h4	SYBR		Unkn			31.0335	31.0335	0				0	60
	E09	6h4	SYBR		Unkn			26.8324	26.8324	0				0	60
	E10	6h4	SYBR		Unkn			26.7227	26.7227	0				0	60
	E11	6h4	SYBR		Unkn			26.727	26.727	0				0	60
	E12	6h4	SYBR		Unkn			26.8765	26.8765	0				0	60
	F01	12h4	SYBR		Unkn			27.0391	27.0391	0				0	60
	F02	12h4	SYBR		Unkn			27.0231	27.0231	0				0	60
	F03	12h4	SYBR		Unkn			27.0479	27.0479	0				0	60
	F04	12h4	SYBR		Unkn			27.0662	27.0662	0				0	60
	F05	CK5	SYBR		Unkn				33.0442	0				0	60
	F06	CK5	SYBR		Unkn			32.0539	32.0539	0				0	60
	F07	CK5	SYBR		Unkn			32.022	32.022	0				0	60
	F08	CK5	SYBR		Unkn			31.7788	31.7788	0				0	60
	F09	3h5	SYBR		Unkn			34.0139	34.0139	0				0	60
	F10	3h5	SYBR		Unkn				37.3042	0				0	60
	F11	3h5	SYBR		Unkn			34.2056	34.2056	0				0	60
	F12	3h5	SYBR		Unkn			34.4333	34.4333	0				0	60
	G01	6h5	SYBR		Unkn			29.9074	29.9074	0				0	60
	G02	6h5	SYBR		Unkn			29.4711	29.4711	0				0	60
	G03	6h5	SYBR		Unkn			29.8888	29.8888	0				0	60
	G04	6h5	SYBR		Unkn			29.5398	29.5398	0				0	60
	G05	12h5	SYBR		Unkn			31.1887	31.1887	0				0	60
	G06	12h5	SYBR		Unkn			30.8643	30.8643	0				0	60
	G07	12h5	SYBR		Unkn			30.9362	30.9362	0				0	60
	G08	12h5	SYBR		Unkn			30.6553	30.6553	0				0	60
	G09	CKn	SYBR		Unkn			20.4515	20.4515	0				0	60
	G10	CKn	SYBR		Unkn			20.8951	20.8951	0				0	60
	G11	CKn	SYBR		Unkn			20.962	20.962	0				0	60
	G12	CKn	SYBR		Unkn			21.0546	21.0546	0				0	60
	H01	3hn	SYBR		Unkn			21.8441	21.8441	0				0	60
	H02	3hn	SYBR		Unkn			21.7898	21.7898	0				0	60
	H03	3hn	SYBR		Unkn			21.5635	21.5635	0				0	60
	H04	3hn	SYBR		Unkn			21.7503	21.7503	0				0	60
	H05	6hn	SYBR		Unkn			21.6151	21.6151	0				0	60
	H06	6hn	SYBR		Unkn			21.5983	21.5983	0				0	60
	H07	6hn	SYBR		Unkn			21.5966	21.5966	0				0	60
	H08	6hn	SYBR		Unkn			21.7547	21.7547	0				0	60
	H09	12hn	SYBR		Unkn			21.5221	21.5221	0				0	60
	H10	12hn	SYBR		Unkn			21.3684	21.3684	0				0	60
	H11	12hn	SYBR		Unkn			21.523	21.523	0				0	60
	H12	12hn	SYBR		Unkn			21.5424	21.5424	0				0	60

## Sheet: Run Information
File Name	hot1-5.pcrd
Created By User	admin
Notes
ID
Run Started	06/22/2022 13:41:59 UTC
Run Ended	06/22/2022 14:55:08 UTC
Sample Vol	10
Lid Temp	105
Protocol File Name	8.26.prcl
Plate Setup File Name	Quick Plate_96 wells_SYBR Only.pltd
Base Serial Number	CT036332
Optical Head Serial Number	785BR19544
CFX Maestro Version	4.1.2433.1219.
