# Supplementary material for: Comprehensive identification and expression analysis of CAMTA gene family in Phyllostachys edulis under abiotic stress
Source: PeerJ. 2023 May 8;11:e15358. doi: 10.7717/peerj.15358 (PMC10174056; doi:10.7717/peerj.15358)
Supplement: Supplemental Information 3 [file peerj-11-15358-s003.xlsx]

## Sheet: Sheet1
Name of the gene	F/R	Sequence	TM/℃	Length/bp
PHCAMTA01	F	CAAGGGTGGCAAACAAAGTT	60	152
	R	TAATTGGGCTTTCAGCATCC
PHCAMTA02	F	TTGGATGGGAAAACACCAAT	60	190
	R	CTGCAAGCAACTTTGGTGAA
PHCAMTA03	F	AGTCCACATGGTGCAACAAA	60	229
	R	CAGCAAATTGATCCTGCTGA
PHCAMTA04	F	CATGGGGAGGAGAATGAGAA	60	238
	R	TAATTGGGCTTTCAGCATCC
PHCAMTA05	F	GGTGAAAGCTCGCTTAGTGG	60	168
	R	GGATGAAGCAGGAGCGTAAG
PHCAMTA06	F	GATACGACTGGGCTTTGGAA	60	232
	R	GACAGGCCCTTGAAACCATA
PHCAMTA07	F	CAAGAAGGACGGAAGCAGAC	60	160
	R	CCTCGAGCATCTTTTCTTGC
PHCAMTA08	F	CAAGAAGGACGGAAGCAGAC	60	160
	R	CCTCGAGCATCTTTTCTTGC
PHCAMTA09	F	ATGGTTTCAAGGGCCTTTCT	60	212
	R	TCGGGTAGCTCCTAGGGAAT
PHCAMTA10	F	TAGGCCTCCAAGTGGTTCAC	60	218
	R	CCTCCTCCAGCATCCAATAA
PHCAMTA11	F	CCAAGCATGAGCAGGGTATT	60	169
	R	AGAAGTGCAGCGACCATCTT
